# Supplementary material
Source: publisher figshare collection journal article supplement (https://karger.figshare.com/articles/dataset/_/4580890)
Supplement: Supplementary file 3 [file 1]

Supplemental Figure 1. Adjusted means and 95% CI for EuroQol-5 Dimensional (EQ-5D) score by eGFR (A) and UACR categories.  $p = 0.443$   $p = 0.040$

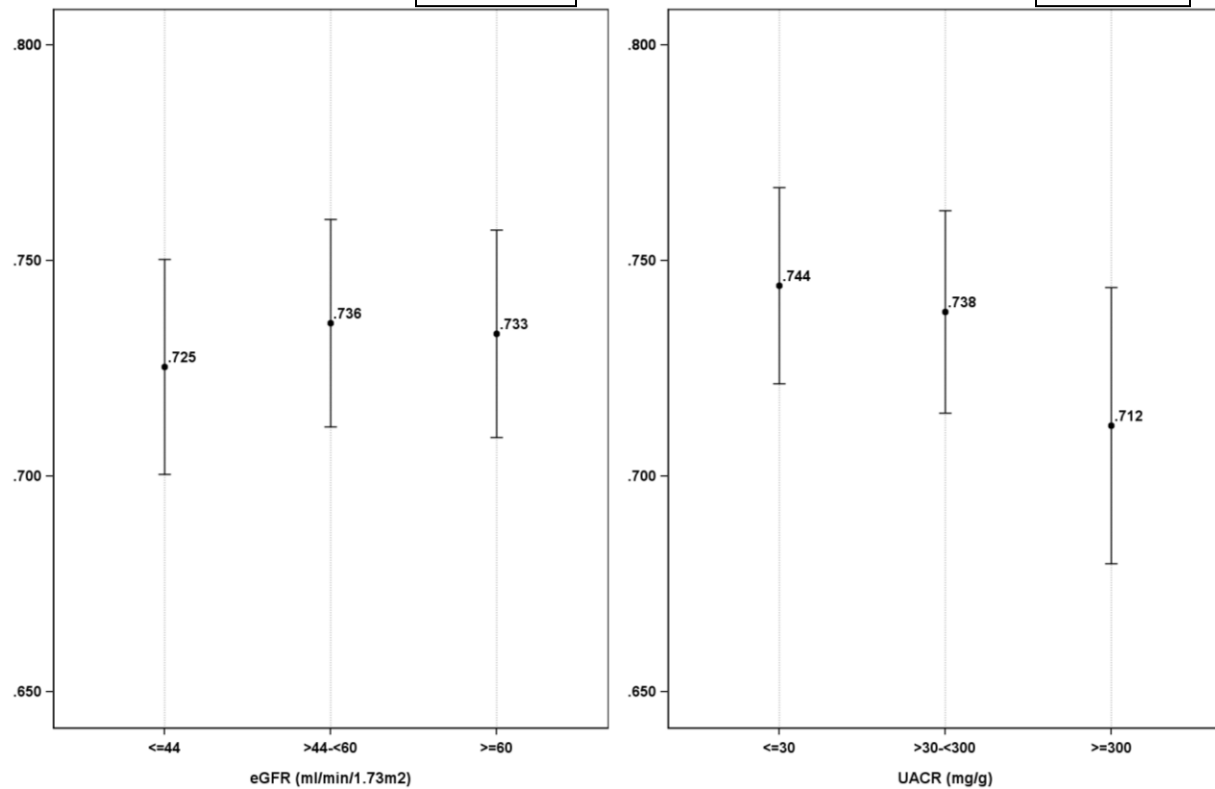

Adjusted means and 95% confidence intervals for EQ-5D score for each category of eGFR (A) and UACR (B). Co-variables include age, gender, race, BMI, smoking status, and drinking status, coronary artery disease, congestive heart failure, peripheral vascular disease, arthritis, low back pain, depression, SBP, DBP and orthostatic hypotension. In addition, UACR was included in the eGFR-based model and eGFR in the UACR-based model.
